# Supplementary material
Source: PubMed Central journal article supplement (PMC4086944)
Supplement: NIHMS534117-supplement-01.pdf [file NIHMS534117-supplement-01.pdf]

## RTOG Acute Radiation Morbidity Scoring Criteria

| Grade                 | 0         | 1                                                                                                                             | 2                                                                                                                                                           | 3                                                                                                                                                                                    | 4                                                                                                                                                                    |
|-----------------------|-----------|-------------------------------------------------------------------------------------------------------------------------------|-------------------------------------------------------------------------------------------------------------------------------------------------------------|--------------------------------------------------------------------------------------------------------------------------------------------------------------------------------------|----------------------------------------------------------------------------------------------------------------------------------------------------------------------|
| Genitourinary (GU)    | No change | Frequency of urination or nocturia twice pretreatment habit/ dysuria, urgency not requiring medication                        | Frequency of urination or nocturia which is less frequent than every hour. Dysuria, urgency, bladder spasm requiring local anesthetic (e.g., Pyridium)      | Frequency with urgency and nocturia hourly or more frequently/ dysuria, pelvis pain or bladder spasm requiring regular, frequent narcotic/gross hematuria with/ without clot passage | Hematuria requiring transfusion/ acute bladder obstruction not secondary to clot passage, ulceration or necrosis                                                     |
| Gastrointestinal (GI) | No change | Increased frequency or change in quality of bowel habits not requiring medication/ rectal discomfort not requiring analgesics | Diarrhea requiring parasympatholytic drugs (e.g., Lomotil)/ mucous discharge not necessitating sanitary pads/ rectal or abdominal pain requiring analgesics | Diarrhea requiring parenteral support/ severe mucous or blood discharge necessitating sanitary pads/abdominal distention (flat plate radiograph demonstrates distended bowel loops)  | Acute or subacute obstruction, fistula or perforation; GI bleeding requiring transfusion; abdominal pain or tenesmus requiring tube decompression or bowel diversion |
