# Supplementary material
Source: PubMed Central journal article supplement (PMC4086944)
Supplement: NIHMS534117-supplement-02.pdf [file NIHMS534117-supplement-02.pdf]

## RTOG Late Morbidity Scoring Criteria

| Grade                    | 0    | 1                                                                                                     | 2                                                                                                               | 3                                                                                                                                                         | 4                                                                                 |
|--------------------------|------|-------------------------------------------------------------------------------------------------------|-----------------------------------------------------------------------------------------------------------------|-----------------------------------------------------------------------------------------------------------------------------------------------------------|-----------------------------------------------------------------------------------|
| Genitourinary<br>(GU)    | None | Slight epithelial atrophy<br>Minor telangiectasia (microscopic hematuria)                             | Moderate frequency<br>Generalized telangiectasia<br>Intermittent macroscopic hematuria                          | Severe frequency and dysuria<br>Severe generalized telangiectasia (often with petechiae)<br>Frequent hematuria<br>Reduction in bladder capacity (<150 cc) | Necrosis/<br>Contracted bladder (capacity <100 cc)<br>Severe hemorrhagic cystitis |
| Gastrointestinal<br>(GI) | None | Mild diarrhea<br>Mild cramping<br>Bowel movement 5 times daily<br>Slight rectal discharge or bleeding | Moderate diarrhea and colic<br>Bowel movement >5 times daily<br>Excessive rectal mucus or intermittent bleeding | Obstruction or bleeding requiring surgery                                                                                                                 | Necrosis/<br>Perforation<br>Fistula                                               |
